# Supplementary material
Source: bioRxiv or medRxiv preprint supplement (https://www.biorxiv.org/highwire/filestream/83314/field_highwire_adjunct_files/3/271361-4.pdf)
Supplement: Supplementary file [file 271361-4.pdf]

All pairwise CSCS

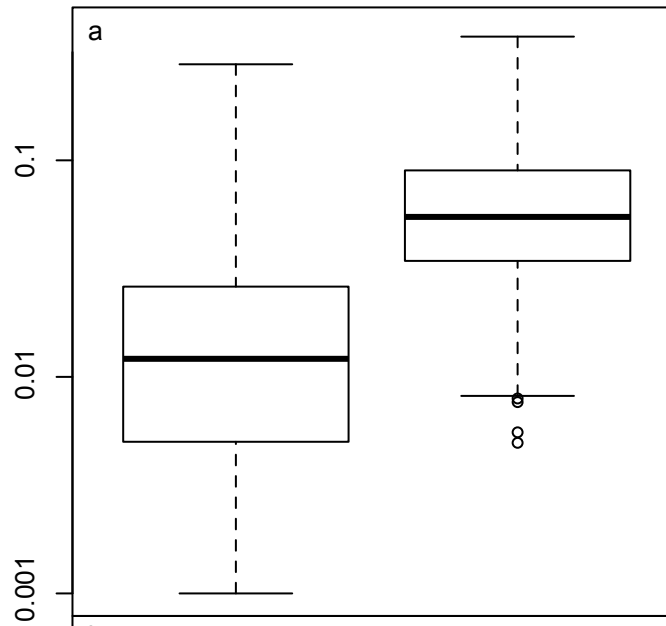

Nearest-neighbor CSCS

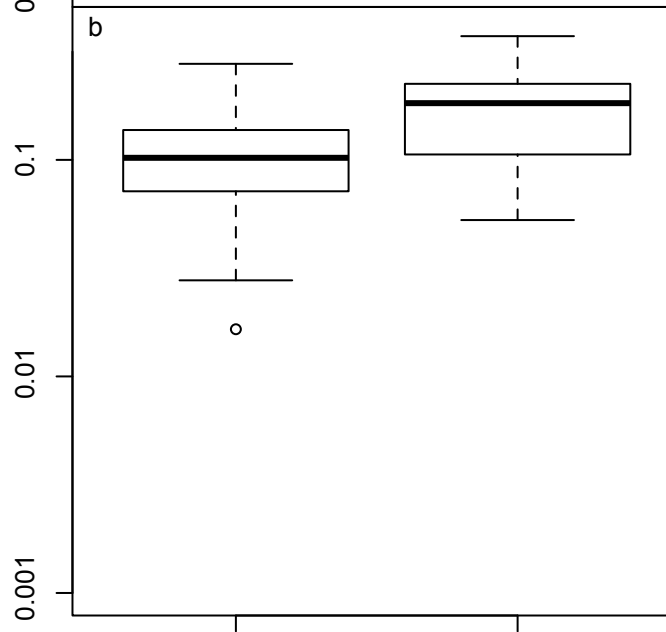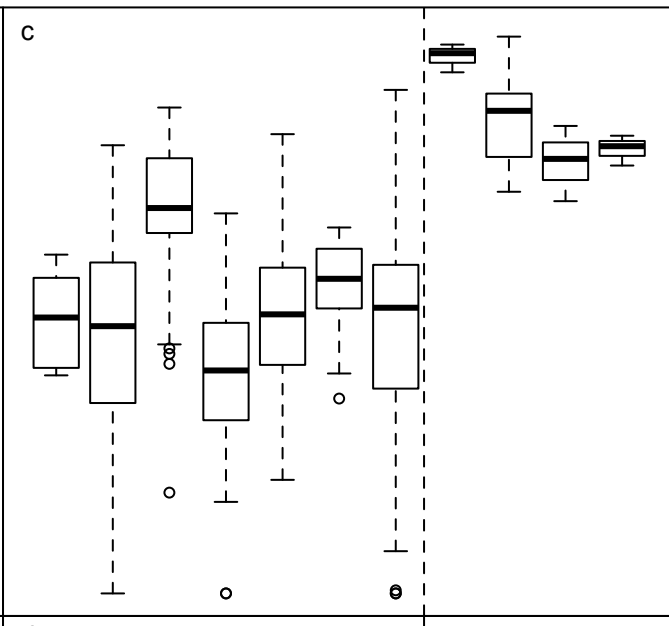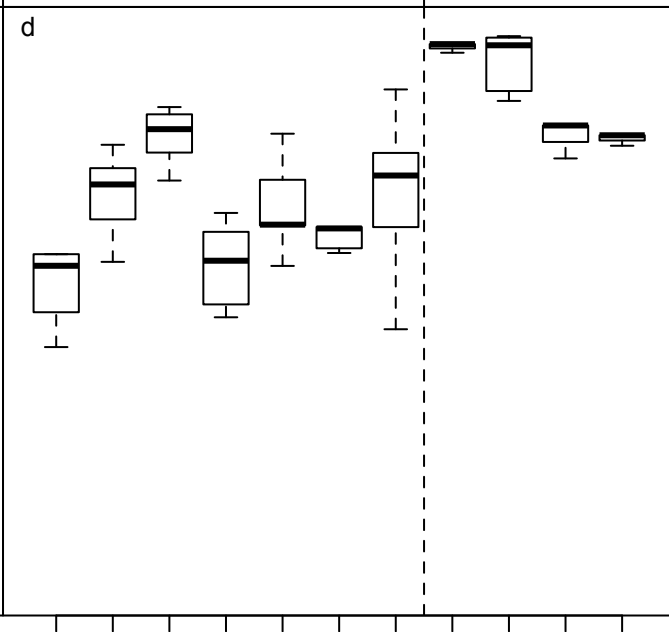

*Eugenia* *Miconia* *Piper* *Psychotria* *Quercus* *Viburnum*  
*Inga* *Ocotea* *Protium* *Carya* *Rubus*

BCI

SERC

BCI

SERC
